# Supplementary material for: Gas-induced controllable synthesis of the Cu(100) crystal facet for the selective electroreduction of CO2 to multicarbon products
Source: Royal Society of Chemistry journal article supplement (doi:10.1039/d3nr05023h), 2024-01-01
Supplement: d3nr05023h1.pdf [file d3nr05023h1.pdf]

## Supporting Information

### **Gas-induced controllable synthesis of Cu(100) crystal facet for selective electroreduction of CO<sub>2</sub> to multicarbon products**

Haoyang Wu <sup>a, ‡</sup>, Zhili Wang <sup>a, ‡</sup>, Benqiang Tian <sup>a</sup>, Yaping Li <sup>a</sup>, Zheng Chang <sup>a\*</sup>, Yun Kuang <sup>a, b\*</sup>,  
Xiaoming Sun <sup>a</sup>

<sup>a</sup> State Key Laboratory of Chemical Resource Engineering, College of Chemistry, Beijing  
University of Chemical Technology, Beijing 100029, P.R. China

<sup>b</sup> Ocean Hydrogen Energy R&D Center, Research Institute of Tsinghua University, Shenzhen  
518057, P.R. China

\* Corresponding Authors

Zheng Chang [changzheng@mail.buct.edu.cn](mailto:changzheng@mail.buct.edu.cn)

Yun Kuang [kuangy@tsinghua-sz.org](mailto:kuangy@tsinghua-sz.org)

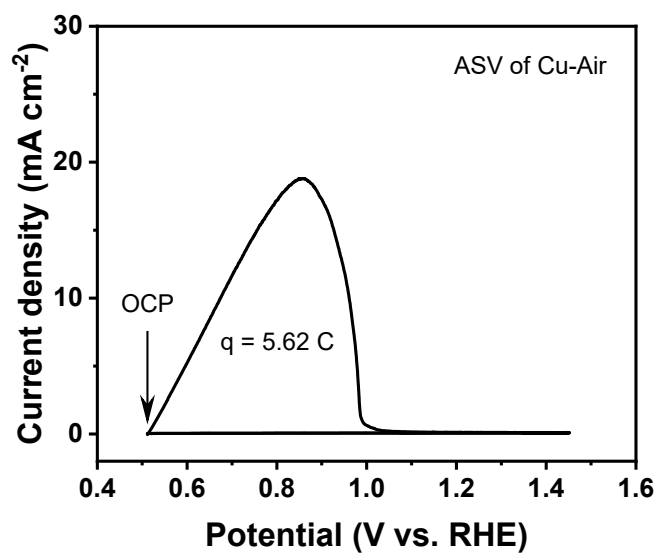

Figure S1. ASV curve of Cu-Air with a scan rate of 1 mV s<sup>-1</sup>.

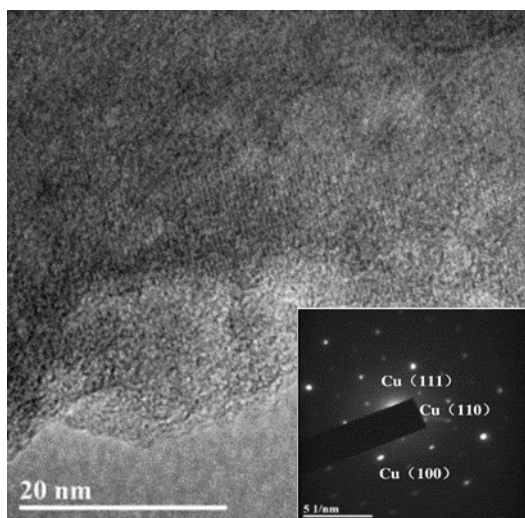

Figure S2. HR-TEM and corresponding SAED images of Cu-CO<sub>2</sub>.

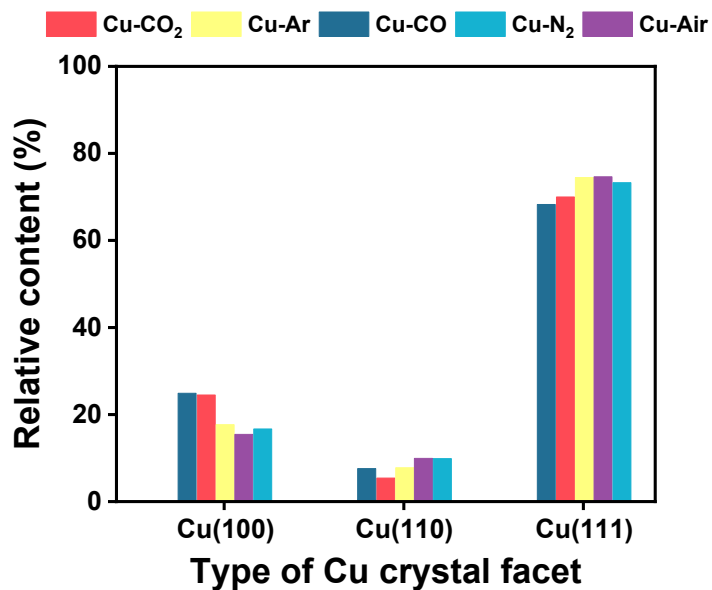

**Figure S3.** Relative contents of Cu(100), Cu(110) and Cu(111) of different Cu-gas based on XRD analysis.

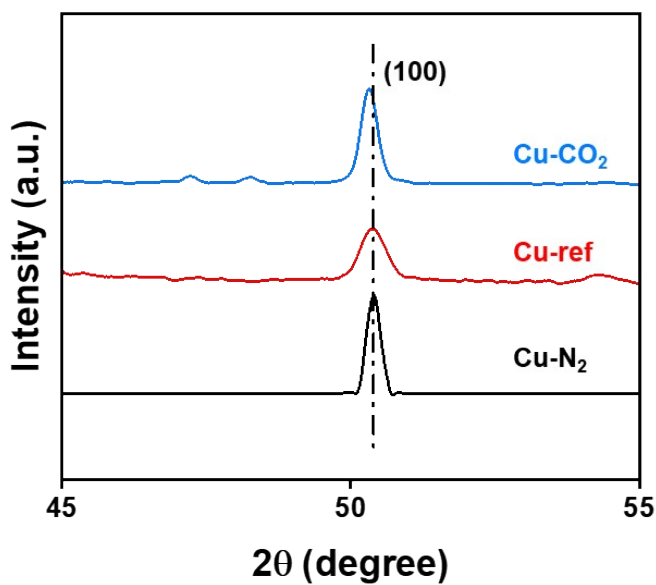

**Figure S4.** High-resolution XRD patterns of Cu-CO<sub>2</sub>, Cu-N<sub>2</sub> and Cu-ref (Cu foil with single Cu(100) crystal facet).

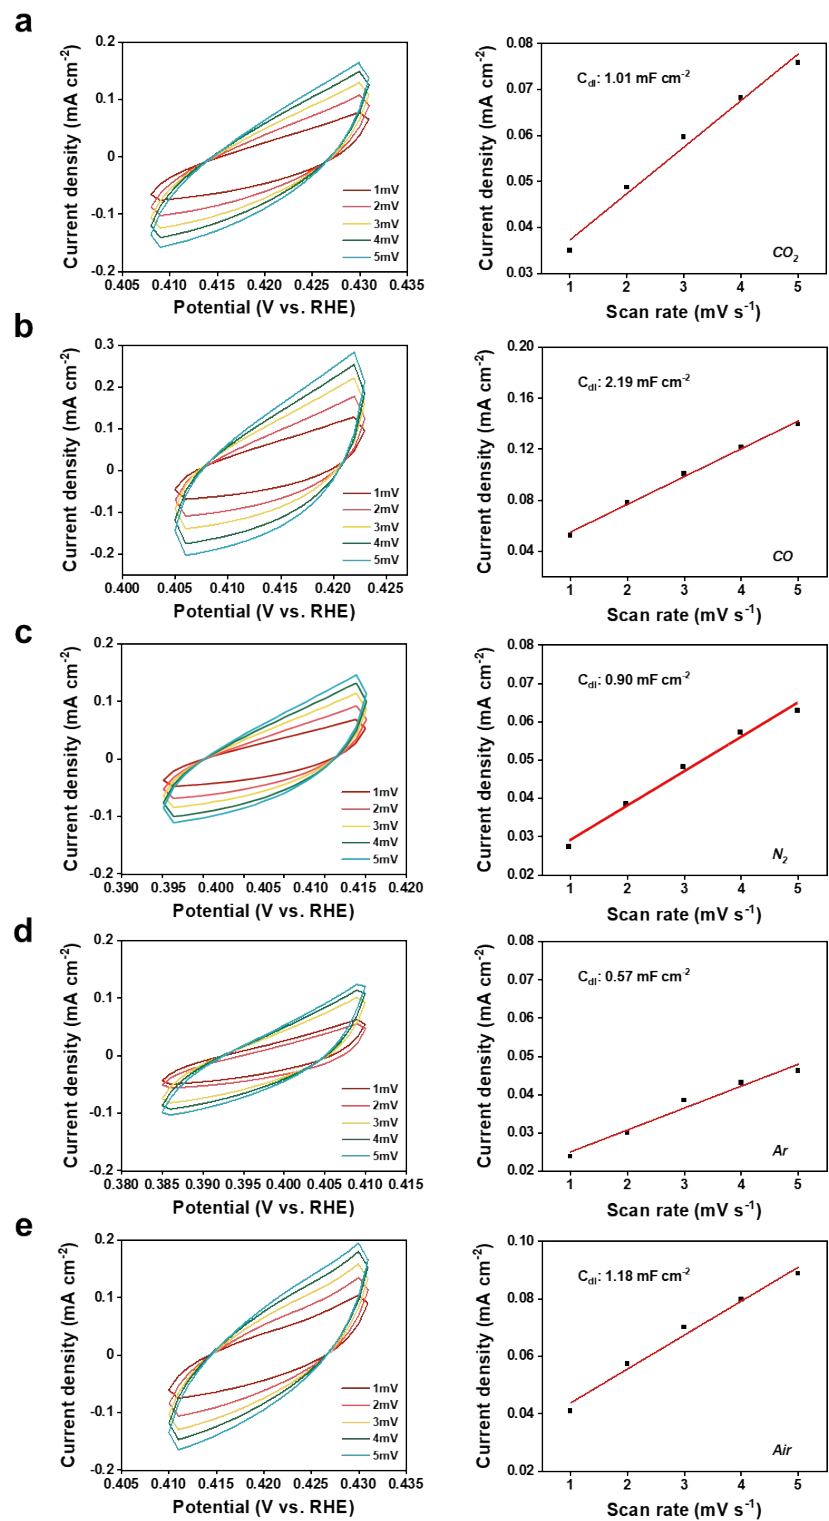

**Figure S5.** CV curves at different scan rates and corresponding  $C_{dl}$  calculation values of (a) Cu-CO<sub>2</sub>, (b) Cu-CO, (c) Cu-N<sub>2</sub>, (d) Cu-Ar, (e) Cu-Air.

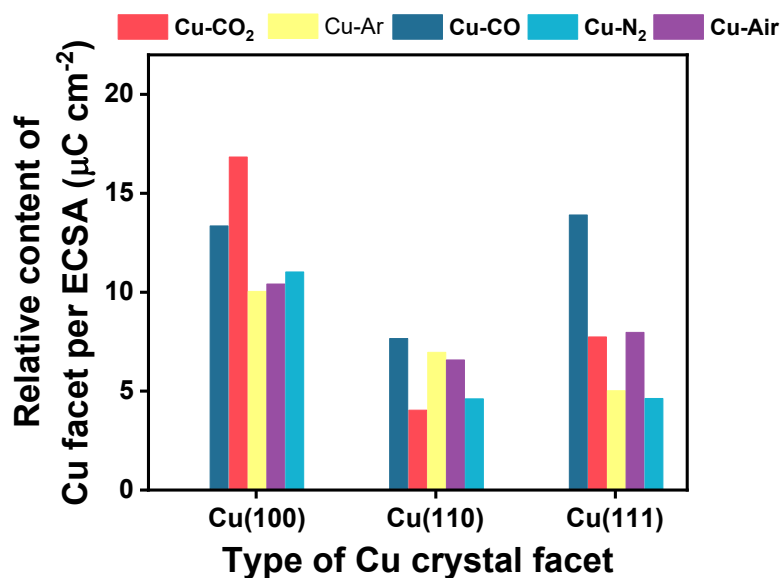

**Figure S6.** Normalized contents of Cu(100), Cu(110) and Cu(111) of the Cu-gas electrocatalysts based on the OH<sup>-</sup> adsorption analysis.

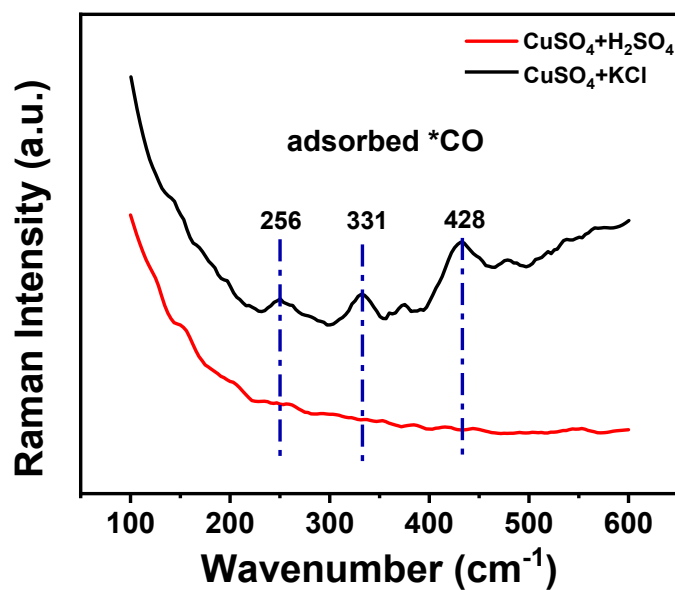

**Figure S7.** In-situ Raman spectra of Cu-CO<sub>2</sub> in acidic and neutral catholytes during the Cu electrodeposition process.

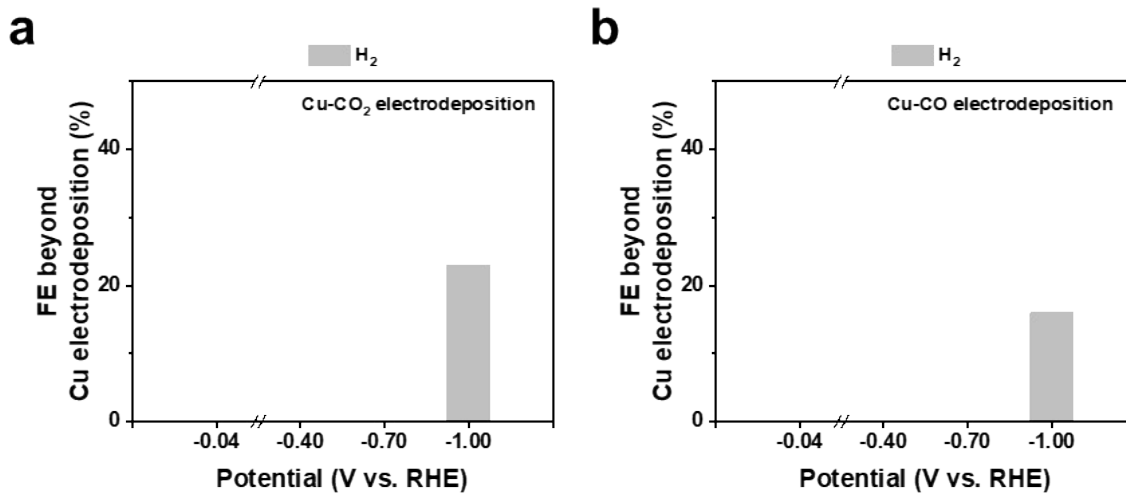

Figure S8. FE beyond Cu electrodeposition at different potentials under (a) CO<sub>2</sub> and (b) CO.

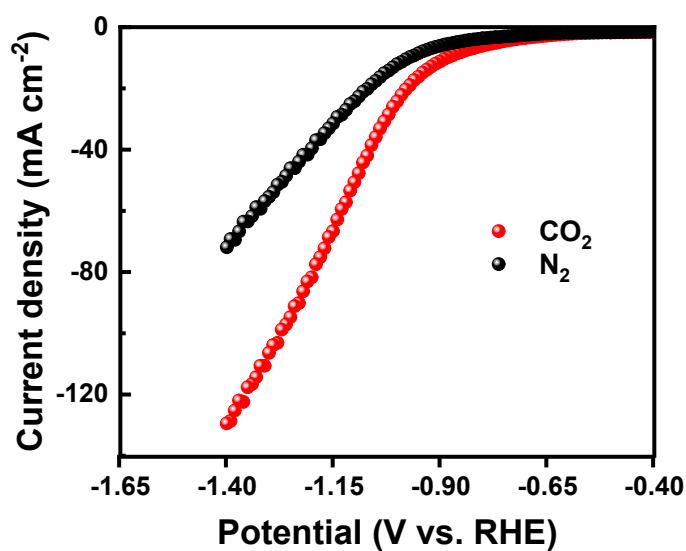

Figure S9. LSV curves of Cu-CO<sub>2</sub> in 1 M KCl catholyte saturated with CO<sub>2</sub> and N<sub>2</sub>.

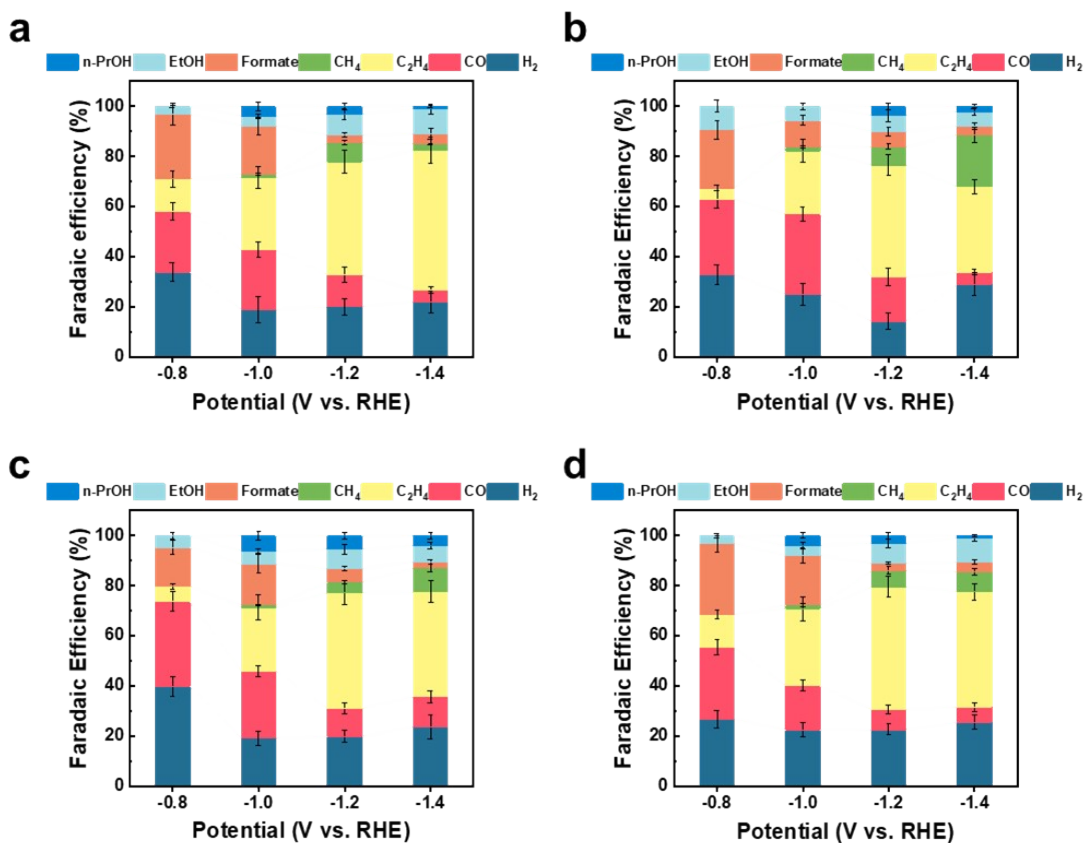

**Figure S10.** Products distribution of (a) Cu-CO, (b) Cu-N<sub>2</sub>, (c) Cu-Ar and (d) Cu-Air after 1 h ECR at different potentials in 1 M KCl catholyte.

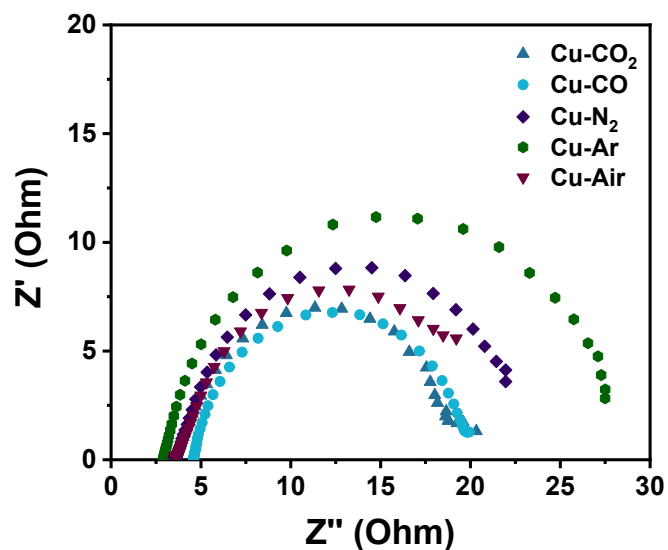

**Figure S11.** EIS plots of the Cu-gas electrocatalysts at -1.4 V (vs. RHE).

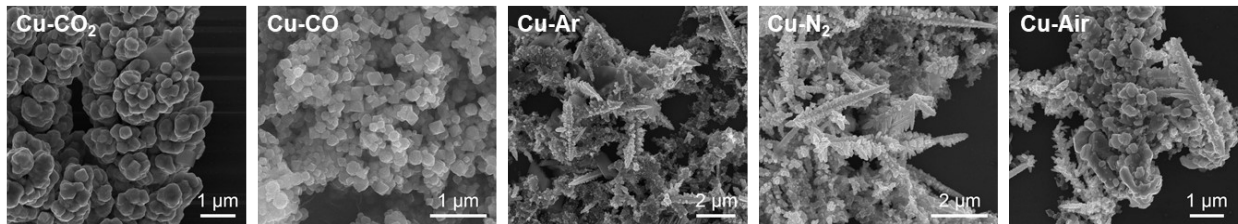

**Figure S12.** SEM images of the Cu-gas catalysts after 1 h ECR at -1.4 V vs. RHE.

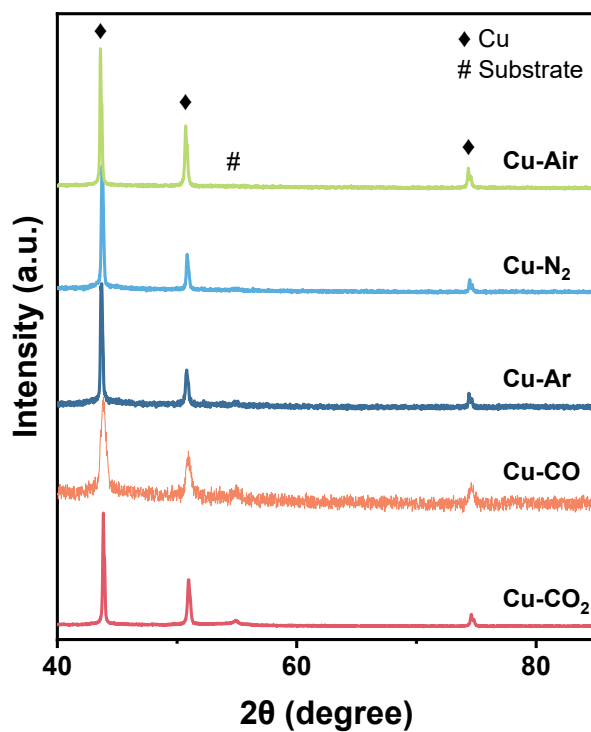

**Figure S13.** XRD patterns of the Cu-gas catalysts after 1 h ECR at -1.4 V vs. RHE.



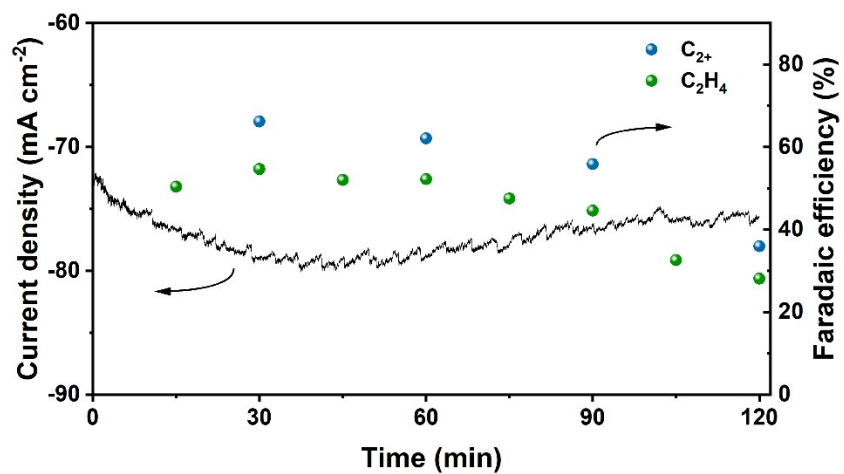

**Figure S14.** The stability test of Cu-CO<sub>2</sub> in ECR at -1.4 V vs. RHE.

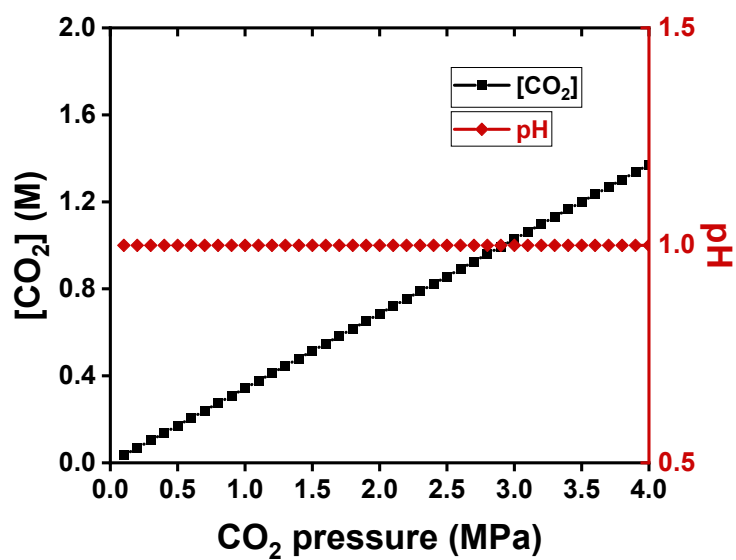

**Figure S15.** CO<sub>2</sub> concentrations and pH values in acidic electrolytes under different CO<sub>2</sub> pressures in the high-pressure electrodeposition device.

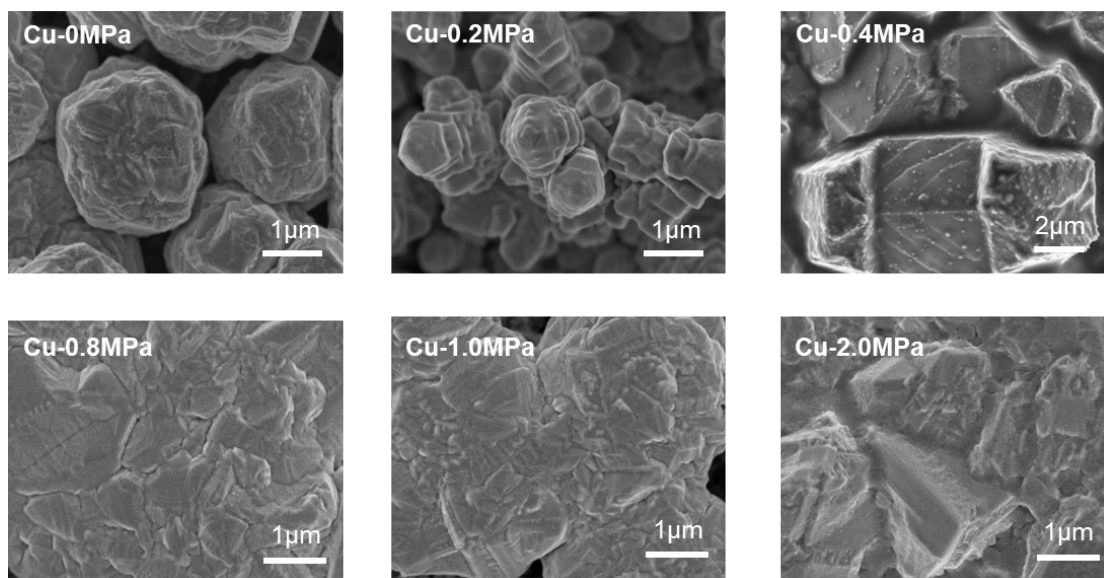

**Figure S16.** SEM images of the Cu-pressure electrocatalysts prepared under different CO<sub>2</sub> pressures from 0 MPa to 2.0 MPa.

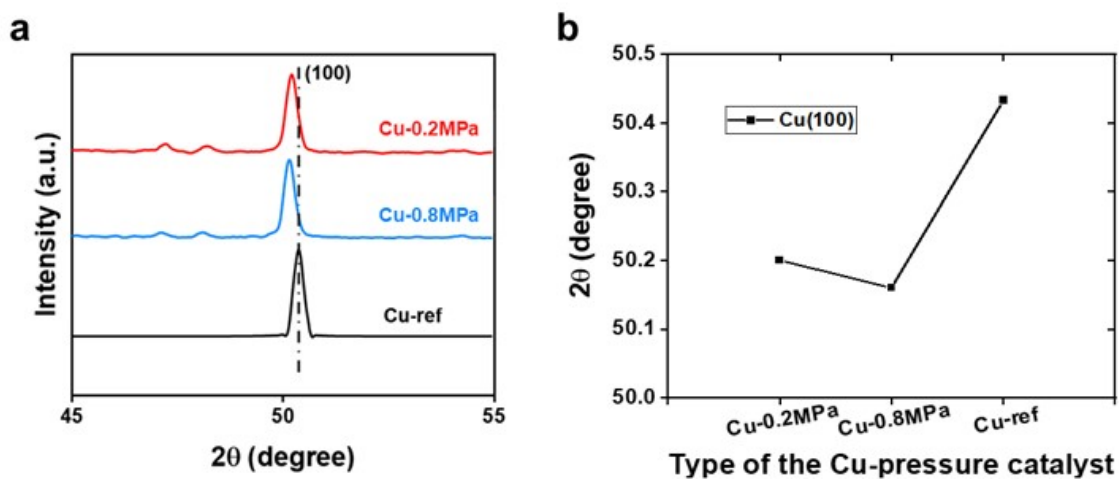

**Figure S17.** (a) High-precision XRD spectra and (b) Diffraction angle degrees of Cu(100) of Cu-0.2MPa, Cu-0.8MPa and Cu-ref (Cu(100) single crystal foil).

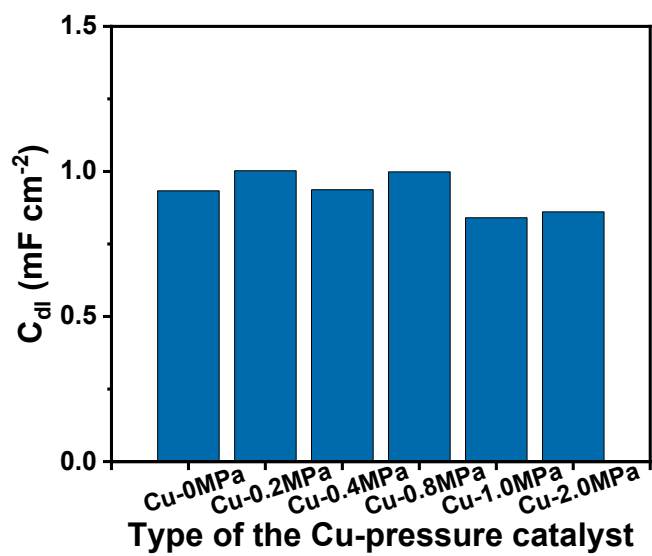

**Figure S18.** ECSA comparison of the Cu-pressure electrocatalysts, which were quantified with CV curves at different scan rates.

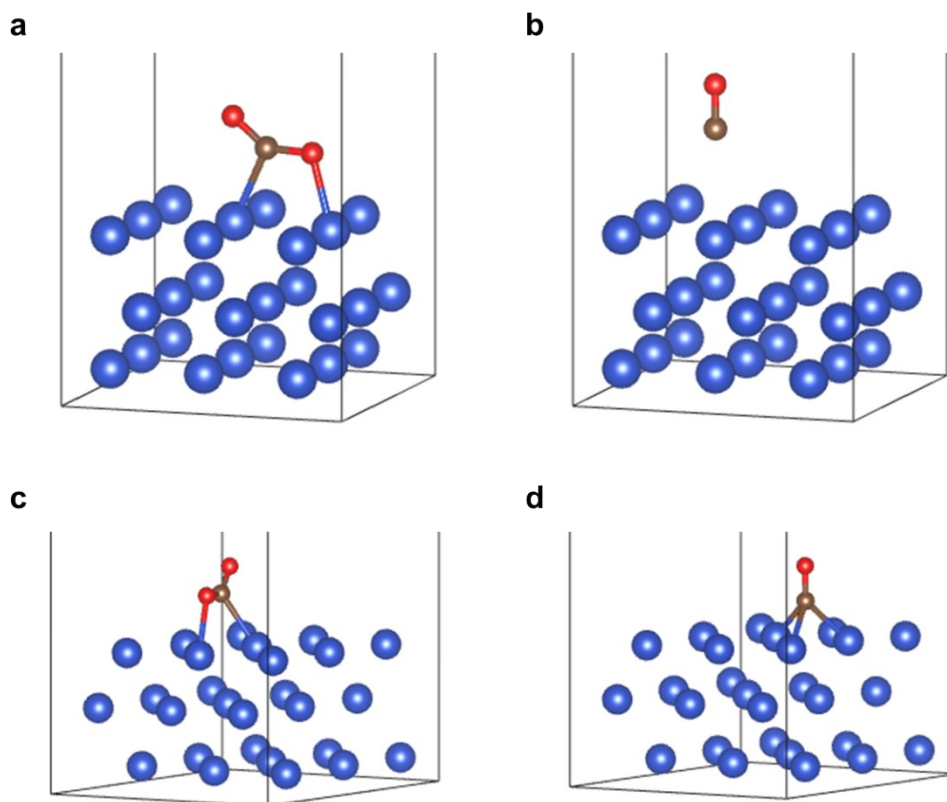

**Figure S19.** Optimized adsorption models of (a) CO<sub>2</sub> on Cu(100), (b) CO on Cu(100) (hcp adsorption), (c) CO<sub>2</sub> on Cu(111), (d) CO on Cu(111) (hcp adsorption).

**Table S1.** ECR performances of Cu-gas at their respective optimal potentials.

| <b>Catalyst</b>    | <b>Potential<br/>(V vs.<br/>RHE)</b> | <b>FE<sub>CO</sub><br/>(%)</b> | <b>FE<sub>CH<sub>4</sub></sub><br/>(%)</b> | <b>FE<sub>C<sub>2</sub>H<sub>4</sub></sub><br/>(%)</b> | <b>FE<sub>Formate</sub><br/>(%)</b> | <b>FE<sub>EtOH</sub><br/>(%)</b> | <b>FE<sub>n-<br/>PrOH</sub><br/>(%)</b> | <b>FE<sub>H<sub>2</sub></sub><br/>(%)</b> | <b>Current<br/>density<br/>(mA<br/>cm<sup>-2</sup>)</b> |
|--------------------|--------------------------------------|--------------------------------|--------------------------------------------|--------------------------------------------------------|-------------------------------------|----------------------------------|-----------------------------------------|-------------------------------------------|---------------------------------------------------------|
| Cu-N <sub>2</sub>  | -1.2                                 | 18.1                           | 7.4                                        | 45.2                                                   | 6.3                                 | 6.4                              | 3.7                                     | 14.6                                      | -53.80                                                  |
| Cu-CO              | -1.4                                 | 4.7                            | 2.0                                        | 55.6                                                   | 4.0                                 | 11.0                             | 1.0                                     | 22.1                                      | -86.27                                                  |
| Cu-CO <sub>2</sub> | -1.4                                 | 5.8                            | 0.5                                        | 55.5                                                   | 2.0                                 | 13.0                             | 1.0                                     | 23.2                                      | -80.75                                                  |
| Cu-Air             | -1.2                                 | 8.0                            | 6.4                                        | 48.9                                                   | 3.0                                 | 8.0                              | 3.0                                     | 22.8                                      | -51.56                                                  |
| Cu-Ar              | -1.2                                 | 10.4                           | 3.9                                        | 42.9                                                   | 4.9                                 | 7.2                              | 5.0                                     | 18.6                                      | -56.50                                                  |
